# Supplementary material for: Exposing residual catalyst in a carbon nanotube sponge
Source: Royal Society of Chemistry journal article supplement (doi:10.1039/c6ra05775f), 2016-01-01
Supplement: c6ra05775f1.pdf [file c6ra05775f1.pdf]

## Supplementary Information

### Exposing Residual Catalyst in a Carbon Nanotube Sponge

Liusi Yang,<sup>1</sup> Yanbing Yang,<sup>2</sup> Xiulan Zhao,<sup>3</sup> Mingchu Zou,<sup>1</sup> Shiting Wu,<sup>1</sup> Ruo Zhao,<sup>1</sup> Chunhui

Wang,<sup>1</sup> Wenjing Xu,<sup>1</sup> Yan Li,<sup>3</sup> Anyuan Cao<sup>1\*</sup>

<sup>1</sup> Department of Materials Science and Engineering, College of Engineering, Peking University, Beijing 100871, P. R. China

<sup>2</sup> College of Chemistry and Molecular Sciences, Wuhan University, Wuhan 430072, China

<sup>3</sup> College of Chemistry and Molecular Engineering, Peking University, Beijing 100871, P. R. China

### Supporting Information

**Figure S1. More SEM characterization on CNT-Fe<sub>2</sub>O<sub>3</sub> sponges (450°C, air, 60 min).**

**Figure S2. Exposing the residual catalyst in CNT sponges.**

**Figure S3. Newly grown CNTs from reactivated residual catalyst at different re-grown stages.**

**Figure S4. TGA results of as-grown and annealed CNT sponges for different periods (corresponding to 8 and 41 particles/μm<sup>2</sup>, respectively).**

**Figure S5. Pore size distribution of CNT and CNT-Fe<sub>2</sub>O<sub>3</sub> sponges based on the Density Functional Theory (DFT) model.**

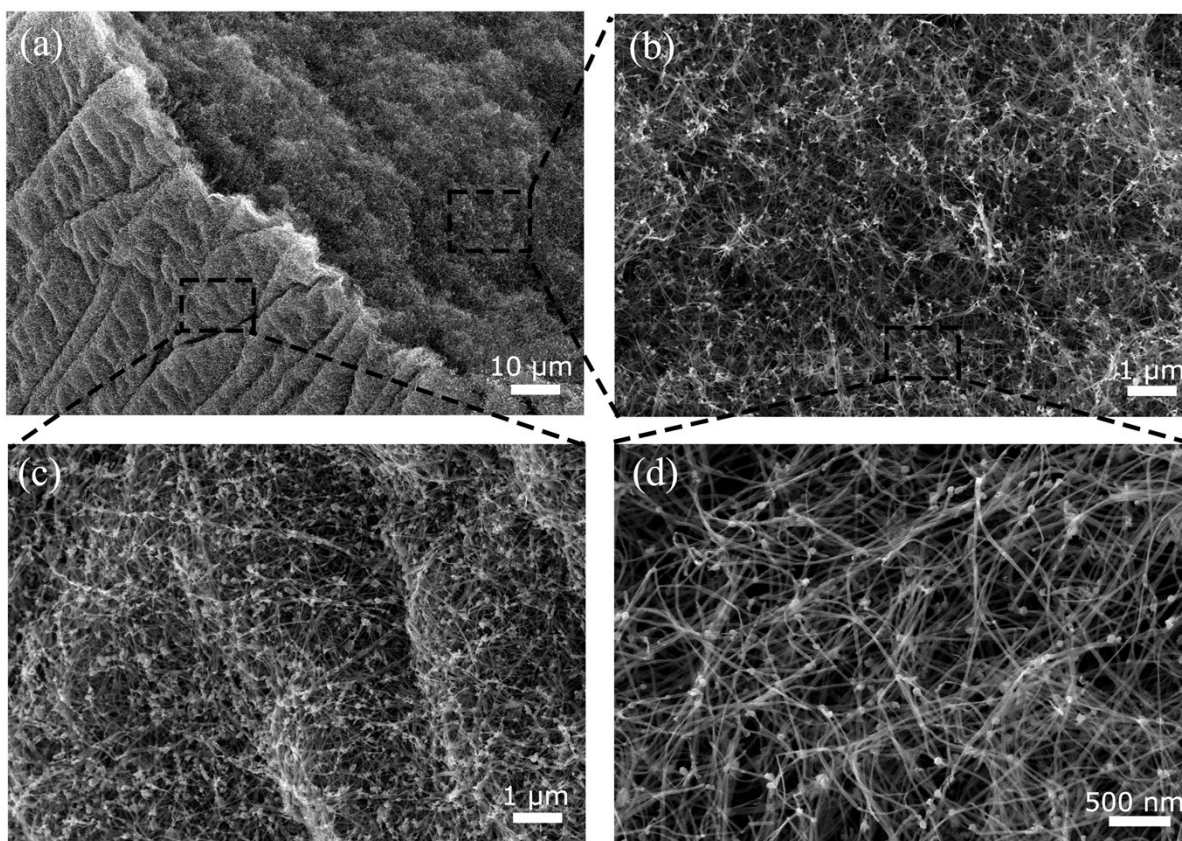

**Figure S1. More SEM characterization on CNT-Fe<sub>2</sub>O<sub>3</sub> sponges (450°C, air, 60 min).** (a) Low magnification image of a bulk sponge showing the side surface (lower left part) and exposed cross-section (top right part). (b) Enlarged view on the cross-section showing uniform dispersion of Fe<sub>2</sub>O<sub>3</sub> nanoparticles. (c) SEM image on the surface showing increased density of Fe<sub>2</sub>O<sub>3</sub> nanoparticles. (d) High magnification view of (b).

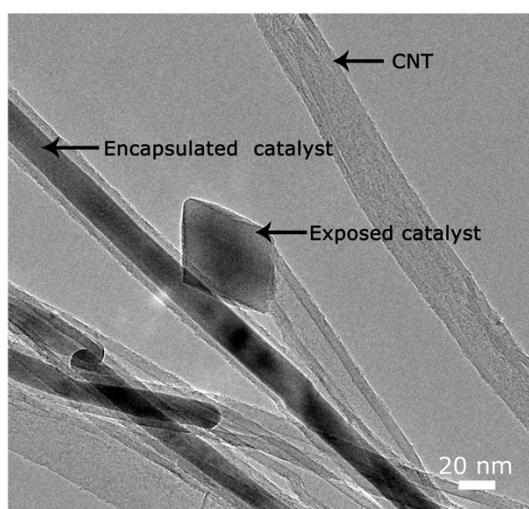

**Figure S2. Exposing the residual catalyst in CNT sponges.** TEM image of CNT-Fe<sub>2</sub>O<sub>3</sub> sponges (800°C, Ar, 30min) showing encapsulated residual catalyst and exposed crystalline particles attached to the ends of CNTs.

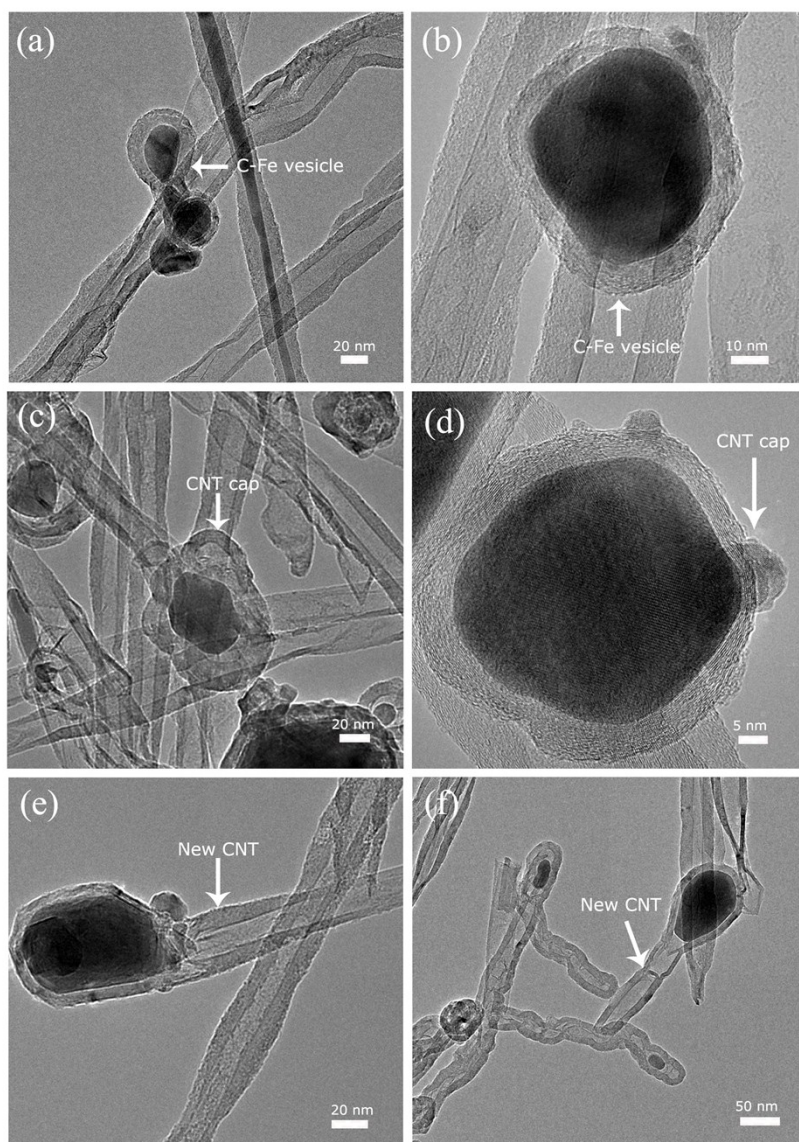

**Figure S3. Newly grown CNTs from reactivated residual catalyst at different re-grown stages.** TEM images of re-grown CNTs showing (a), (b) particles covered by several graphitic layers, (c), (d) CNT caps grown from nanoparticles and (e), (f) multi-walled structure of new CNTs.

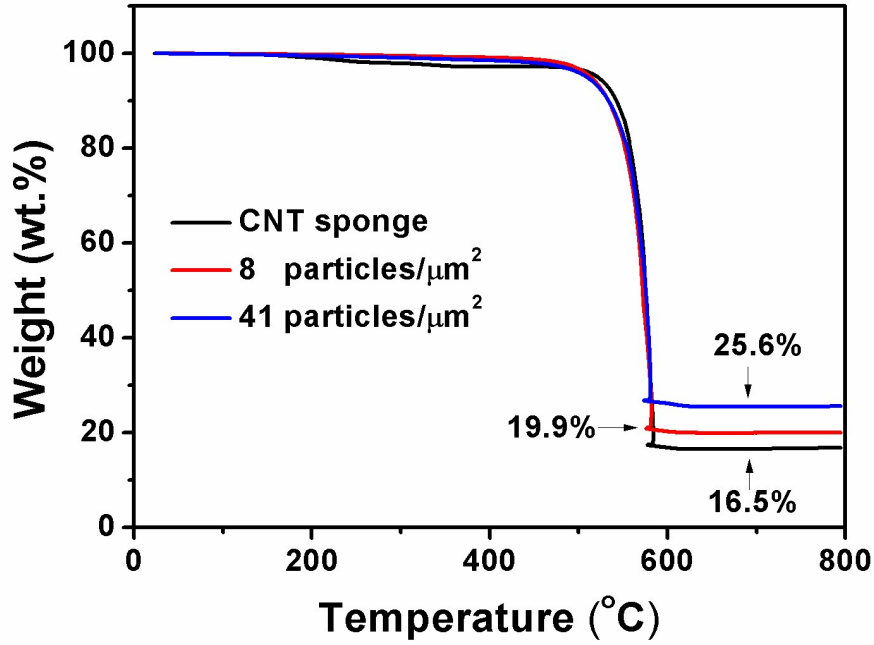

Figure S4. TGA results of as-grown and annealed CNT sponges for different periods (corresponding to 8 and 41 particles/ $\mu\text{m}^2$ , respectively). Weight loss of samples was recorded in air from room temperature to 800°C.

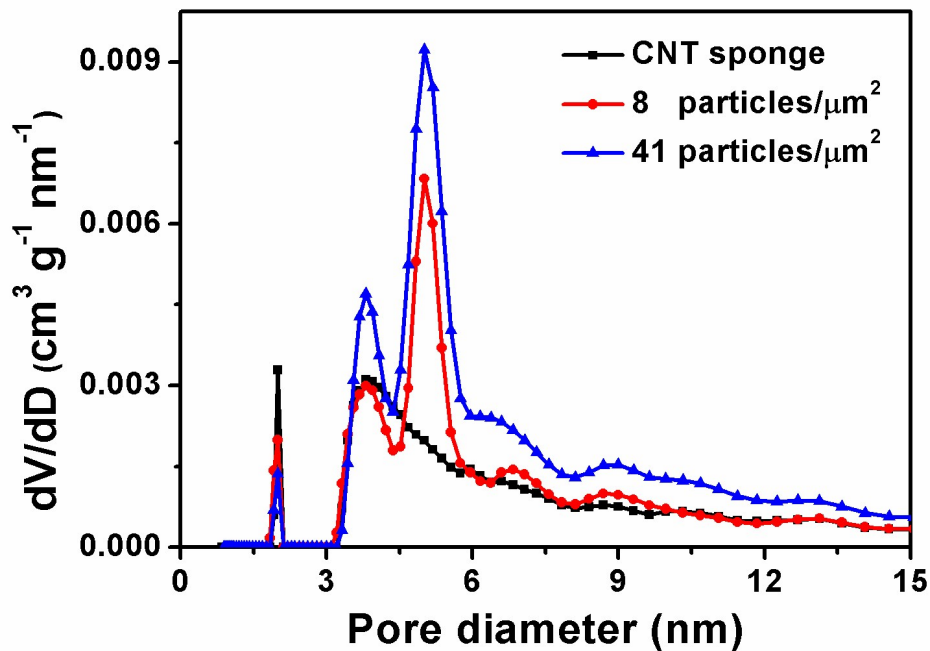

Figure S5. Pore size distribution of CNT and CNT-Fe<sub>2</sub>O<sub>3</sub> sponges based on the Density Functional Theory (DFT) model. Samples are CNT and CNT-Fe<sub>2</sub>O<sub>3</sub> sponges with exposed nanoparticle average areal densities of about 8 (number of particles enclosed) and 41 particles/ $\mu\text{m}^2$ .
